# Supplementary material for: Efficient Fabrication of Polycaprolactone Scaffolds for Printing Hybrid Tissue-Engineered Constructs
Source: MDPI journal article supplement (doi:10.3390/ma12040613), 2019-02-18
Supplement: s2 [file s2]

Supplementary

# Efficient Fabrication of Polycaprolactone Scaffolds for Printing Hybrid Tissue-Engineered Constructs

Enrique Sodupe-Ortega <sup>1</sup>, Andres Sanz-Garcia <sup>2,3,\*</sup>, Alpha Pernia-Espinoza <sup>1</sup>, and Carmen Escobedo-Lucea <sup>2,\*</sup>

<sup>1</sup> EDMANS Group, Department of Mechanical Engineering, University of La Rioja, San José de Calasanz 31, Edificio Departamental, 26004 Logroño, Spain; enrique.sodupeo@unirioja.es (E.S.-O.); alpha.pernia@unirioja.es (A.P.-E.)

<sup>2</sup> Division of Pharmaceutical Biosciences. University of Helsinki. Viikinkaari 5 E (P.O. Box 56), 00014 Helsinki, Finland

<sup>3</sup> Department of Mechanical Engineering, University of Salamanca, ETSII, Avda, Fernando Ballesteros, 2, 37700 Béjar (Salamanca), Spain

\* Correspondence: andres.sanz-garcia@helsinki.fi (A.S.-G.); carmen.escobedo-lucea@helsinki.fi (C.E.-L.); Tel.: +358-294159326 (A.S.-G.); +358-294159329 (C.E.-L.)

Received: 30 December 2018; Accepted: 11 February 2019; Published: date

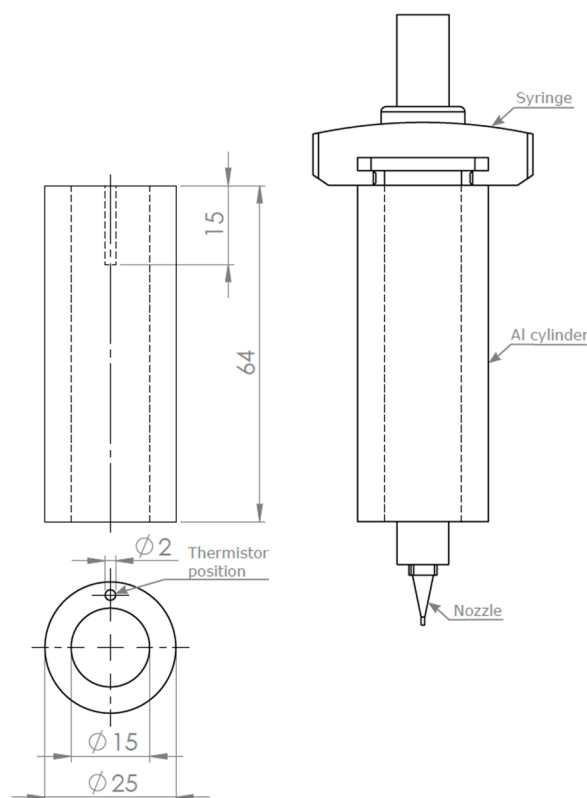

**Figure S1.** Dimensions of the aluminum block located inside the polycarbonate carcass of the printhead for heating the 5 mL stainless steel syringe (see scheme on the right side).

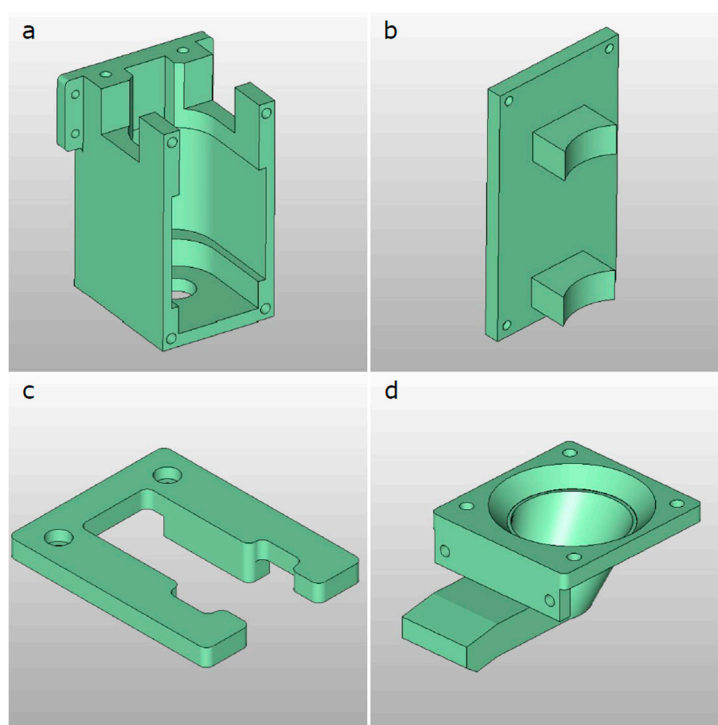

**Figure S2.** Images of the 3D CAD models (STL files) of the 3D printed printhead components. (a) Printhead\_carcass.STL; (b) Front\_cover.STL; (c) Syringe\_cover.STL; (d) Fan\_support.STL.

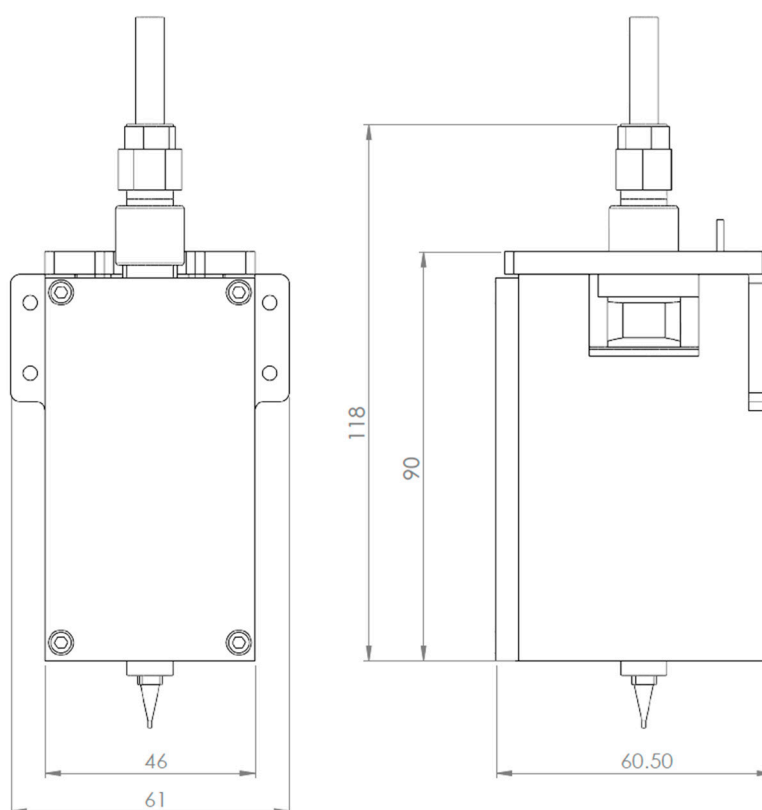

**Figure S3.** Main dimensions of the open-source high-temperature printhead.

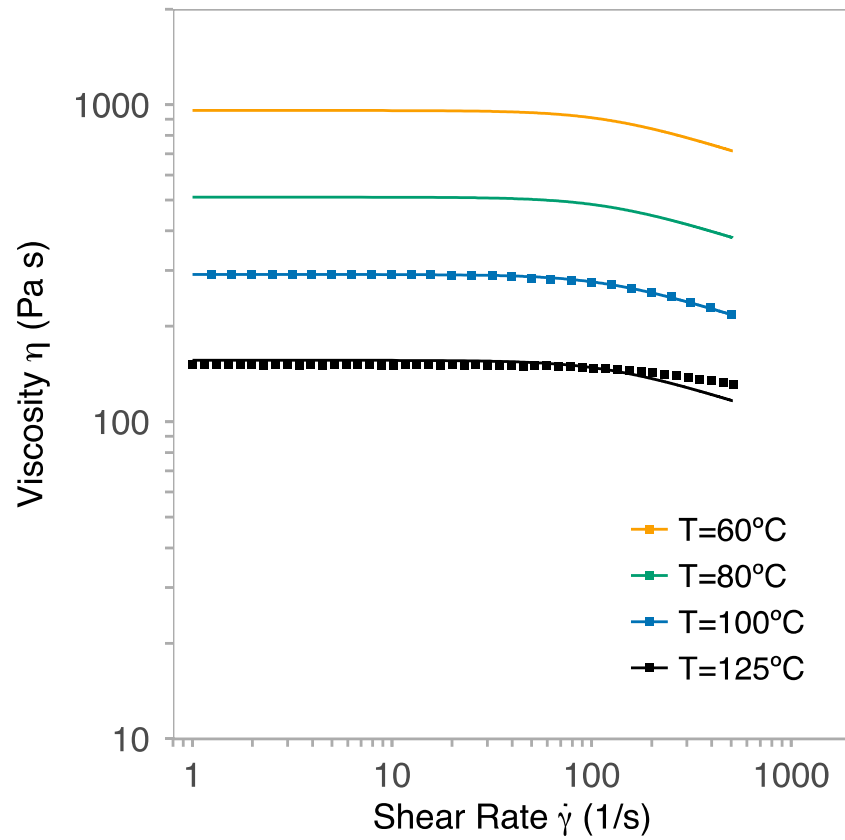

**Figure S4.** The viscosity versus shear rate relationship of CAPA 6400. Points represent the experimental data provided by the manufacturer for temperatures 100 °C and 125 °C. Solid lines are the Bird-Carreau model fittings calculated according to Equation (3).

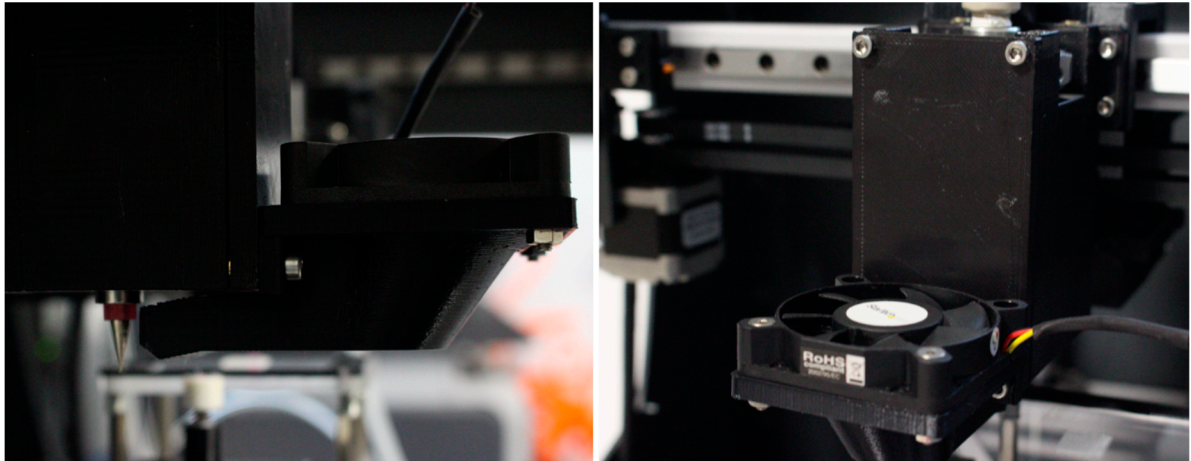

**Figure S5.** Images of the fan support installed on the printhead to increase the cooling rate of the PCL.

**Table 1.** Bill of materials of the printhead, including quantity, cost, description, and provider of each component.

| Part Name                                        | Quantity | Cost (US\$) | Description      | Provider   | Code             |
|--------------------------------------------------|----------|-------------|------------------|------------|------------------|
| Printhead carcass                                | 1        | 1.03        | 3D printed       | 3D printer | -                |
| Front cover                                      | 1        | 0.20        | 3D printed       | 3D printer | -                |
| Syringe cover                                    | 1        | 0.35        | 3D printed       | 3D printer | -                |
| Aluminum block                                   | 1        | 13.49       | SMC <sup>a</sup> | Misumi     | -                |
| M3 brass insert                                  | 6        | 1.52        | SMC <sup>a</sup> | RS Online  | 278-584          |
| Band heater 220V (25 × 25mm)                     | 1        | 7.00        | SMC <sup>a</sup> | LJXH       | 32856328124      |
| Relay 12V-40A                                    | 1        | 3.00        | SMC <sup>a</sup> | Nagares    | RLP/5-12D        |
| Thermistor NTC 100k                              | 1        | 1.56        | SMC <sup>a</sup> | RS Online  | 528-8592         |
| M3x10 screw                                      | 6        | 2.86        | SMC <sup>a</sup> | RS Online  | 660-4636         |
| M3x25 screw                                      | 4        | 1.92        | SMC <sup>a</sup> | RS Online  | 304-4435         |
| Solenoid valve                                   | 1        | 51.95       | SMC <sup>a</sup> | RS Online  | EVT307-6D-02F-Q  |
| Pressure regulator                               | 1        | 19.70       | SMC <sup>a</sup> | RS Online  | AR20-N01BG-RYZ-A |
| Total                                            |          | 84.88       |                  |            |                  |
| <sup>a</sup> SMC = Standard Mechanical Component |          |             |                  |            |                  |

**Video S1:** Porous construct printed in PCL with 10 layers stacked, using a 437  $\mu\text{m}$  nozzle and an 11  $\text{mm s}^{-1}$  print speed.

**Video S2:** Porous constructs printed in PCL and P407 with different nozzles and carriage speeds. PCL: 233  $\mu\text{m}$ , 4  $\text{mm s}^{-1}$  (black); 335  $\mu\text{m}$ , 9  $\text{mm s}^{-1}$  (pink); and 437  $\mu\text{m}$ , 14  $\text{mm s}^{-1}$  (white). P407: 200  $\mu\text{m}$ , 14  $\text{mm s}^{-1}$  (transparent).

**File S1.** 3D printed STLs files of the open-source printhead.
